# Supplementary material for: Synthesis, in vitro evaluation and DNA interaction studies of N-allyl naphthalimide analogues as anticancer agents
Source: Royal Society of Chemistry journal article supplement (doi:10.1039/c5ra00925a), 2015-01-01
Supplement: c5ra00925a1.pdf [file c5ra00925a1.pdf]

## Synthesis, *in vitro* evaluation and DNA interaction studies of N-allyl naphthalimide analogues as anticancer agents

Meenakshi Verma, Vijay Luxami and Kamaldeep Paul\*

School of Chemistry and Biochemistry, Thapar University, Patiala-147 004, India

\*Corresponding author. Tel.: +91 9465670595; fax: +91 175 236 4498.

E-mail address: [kpaul@thapar.edu](mailto:kpaul@thapar.edu) (K. Paul)

### Table of contents

|                                                                                      |     |
|--------------------------------------------------------------------------------------|-----|
| <sup>1</sup> H and <sup>13</sup> C NMR spectra of compounds <b>4</b> and <b>6a-n</b> | S2  |
| Five dose results                                                                    | S17 |
| Ethidium bromide displacement of compound <b>6b</b>                                  | S19 |
| Docking of compound <b>6b</b>                                                        | S19 |

$^1\text{H}$  and  $^{13}\text{C}$  NMR spectra of compounds **4**, **6a-n**

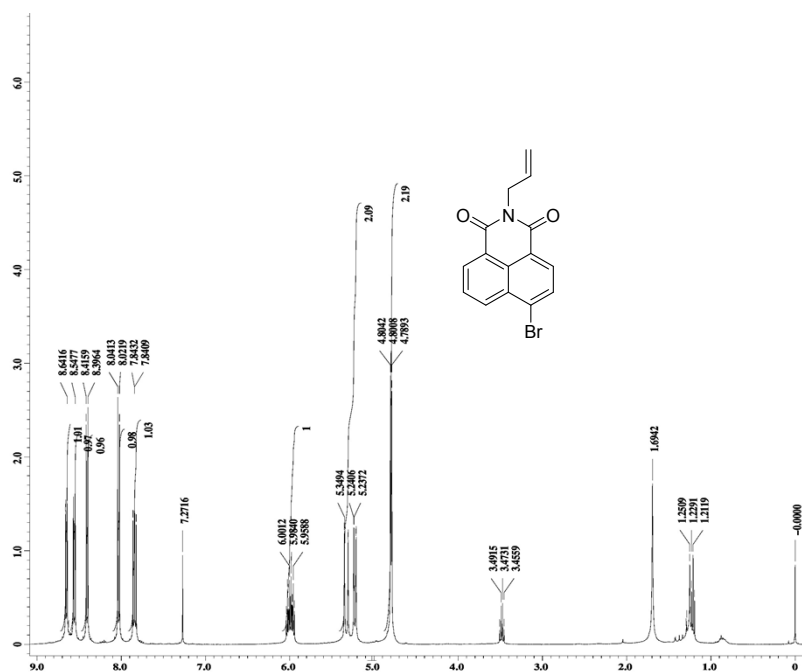

Figure S1:  $^1\text{H}$  NMR spectrum of 2-allyl-6-bromo-benzo[de]isoquinoline-1,3-dione (**4**)

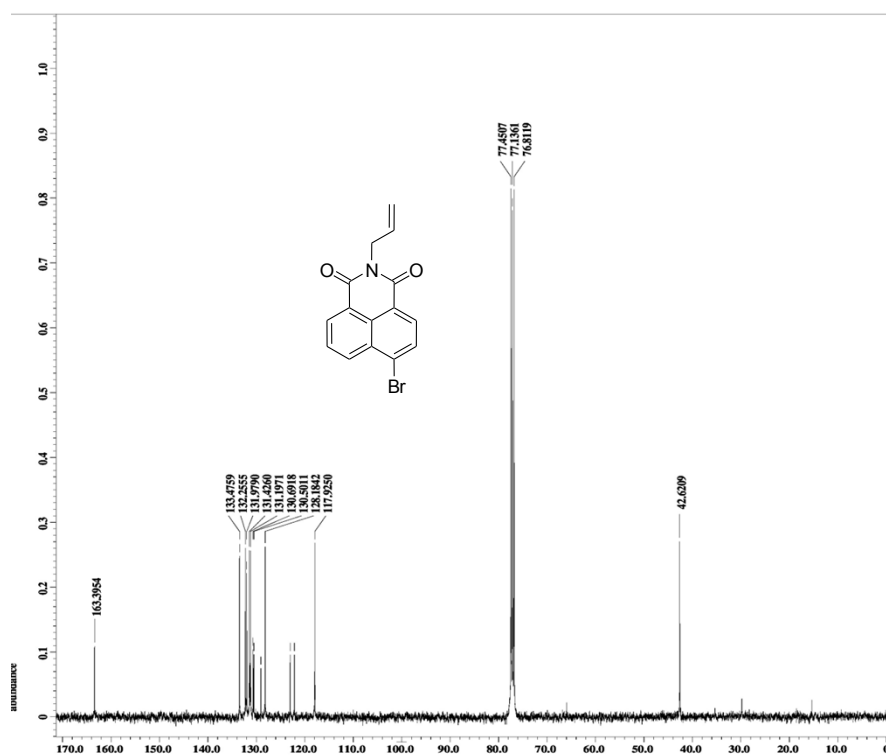

Figure S2:  $^{13}\text{C}$  NMR spectrum of 2-allyl-6-bromo-benzo[de]isoquinoline-1,3-dione (**4**)

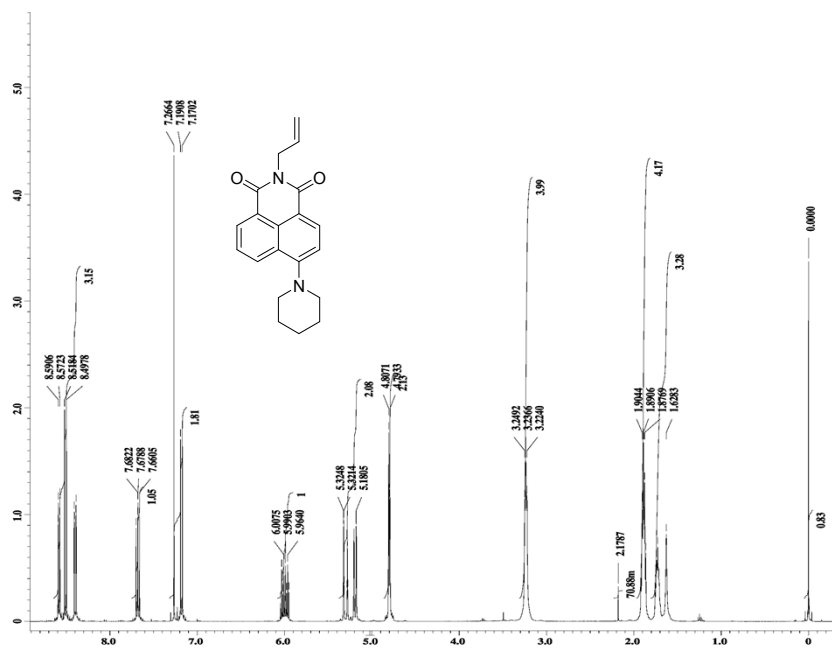

Figure S3:  $^1\text{H}$  NMR spectrum of 2-allyl-6-piperidin-1-yl-benzo[de]isoquinoline-1,3-dione (6a)

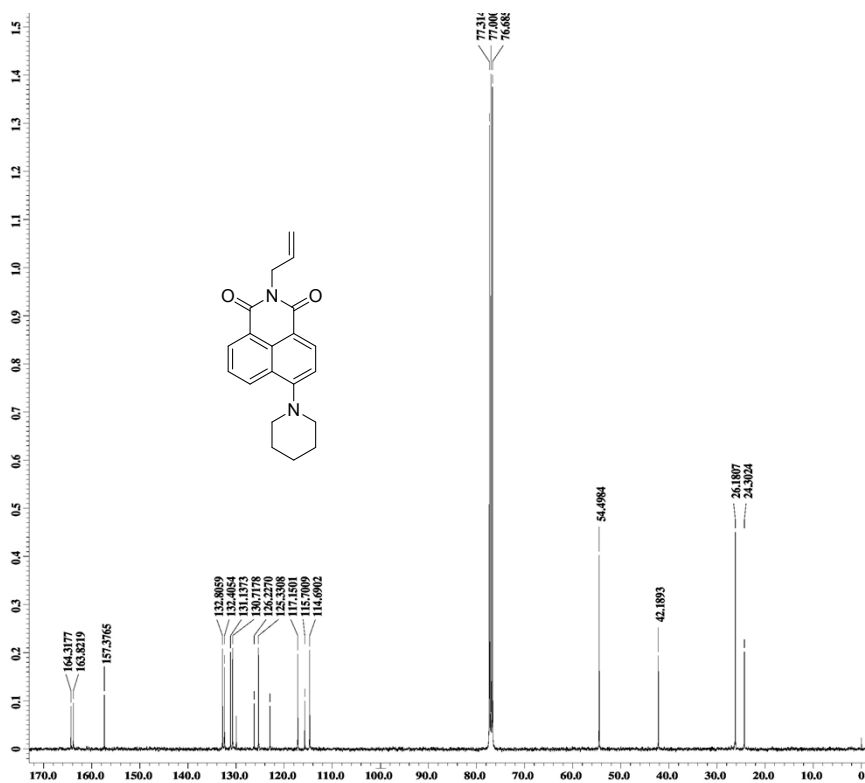

Figure S4:  $^{13}\text{C}$  NMR spectrum of 2-allyl-6-piperidin-1-yl-benzo[de]isoquinoline-1,3-dione (6a)

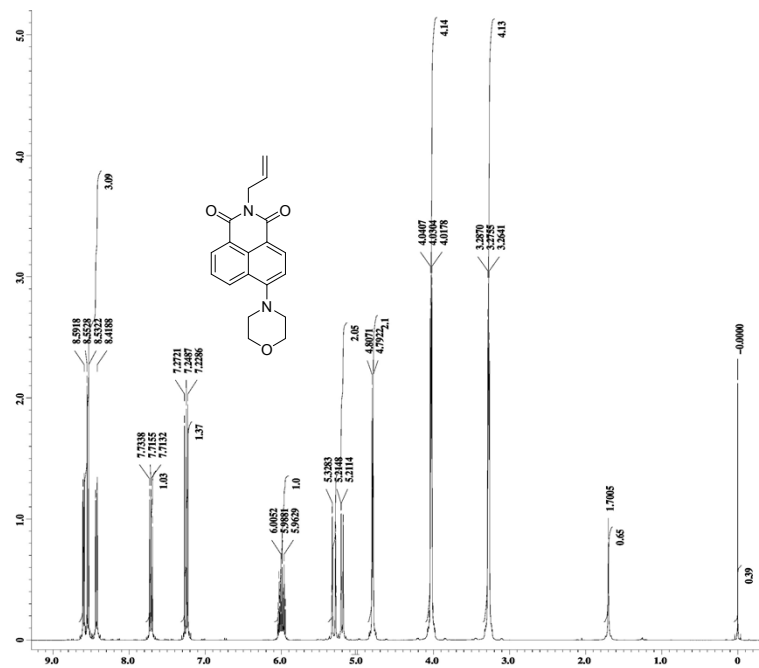

Figure S5:  $^1\text{H}$  NMR spectrum of 2-allyl-6-morpholin-4-yl-benzo[de]isoquinoline-1,3-dione (**6b**)

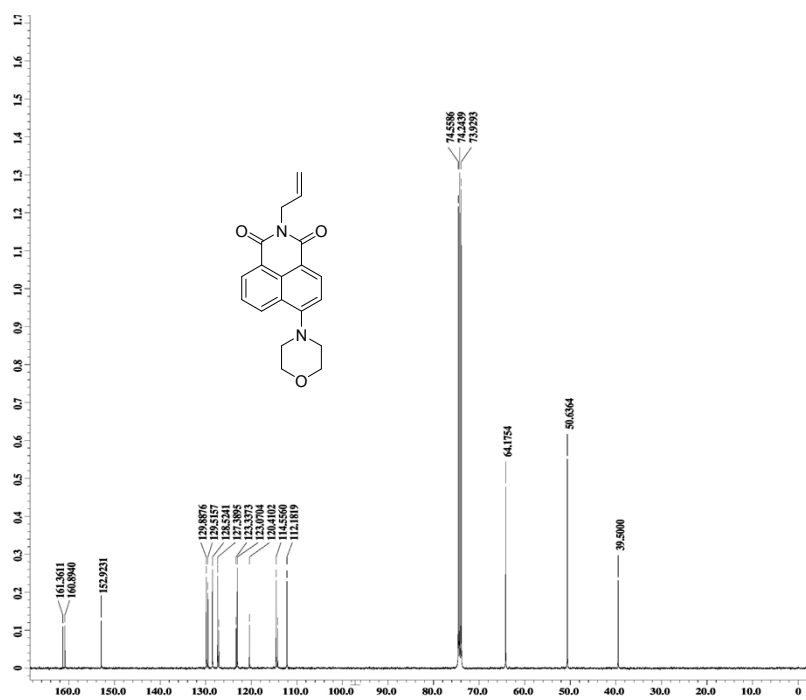

Figure S6:  $^{13}\text{C}$  NMR spectrum of 2-allyl-6-morpholin-4-yl-benzo[de]isoquinoline-1,3-dione (**6b**)

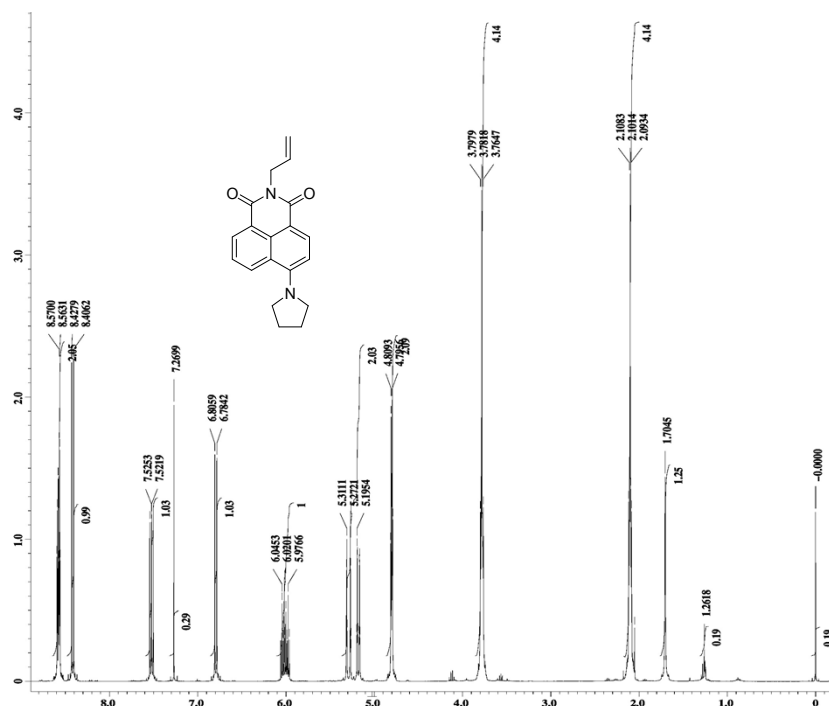

Figure S7:  $^1\text{H}$  NMR spectrum of 2-allyl-6-pyrrolidin-1-yl-benzo[de]isoquinoline-1,3-dione (6c)

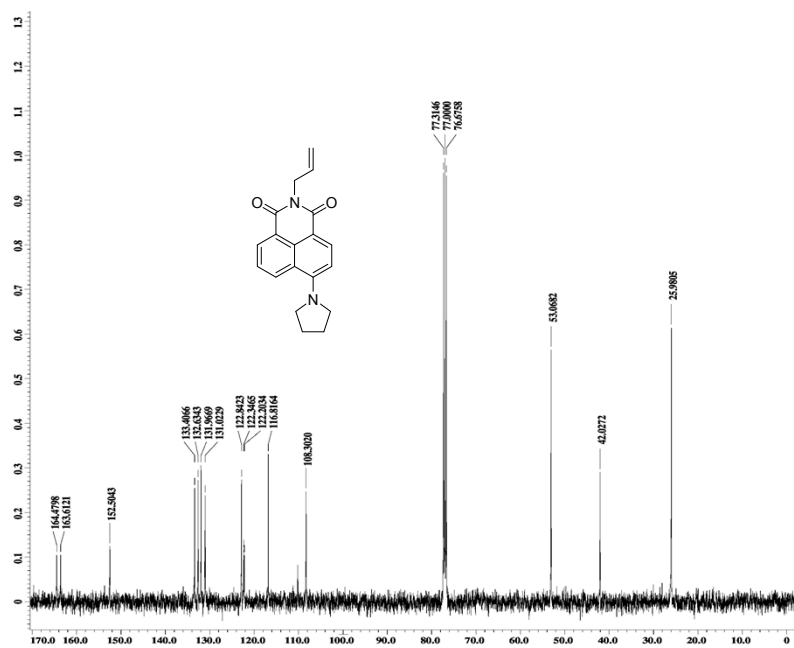

Figure S8:  $^{13}\text{C}$  NMR spectrum of 2-allyl-6-pyrrolidin-1-yl-benzo[de]isoquinoline-1,3-dione (6c)

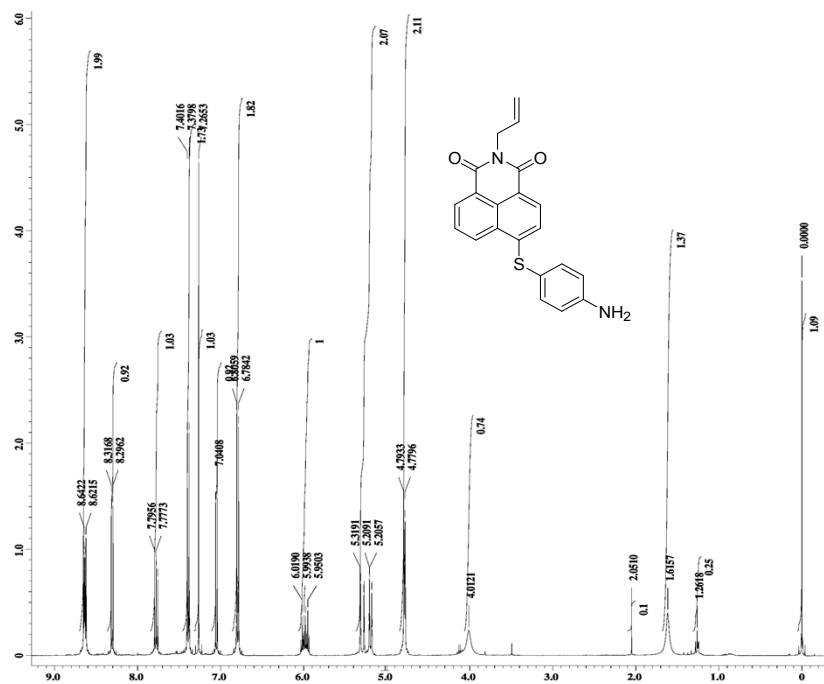

Figure S9:  $^1\text{H}$  NMR spectrum of 2-allyl-6-(4-amino-phenylsulfanyl)-benzo[de]isoquinoline-1,3-dione (**6d**)

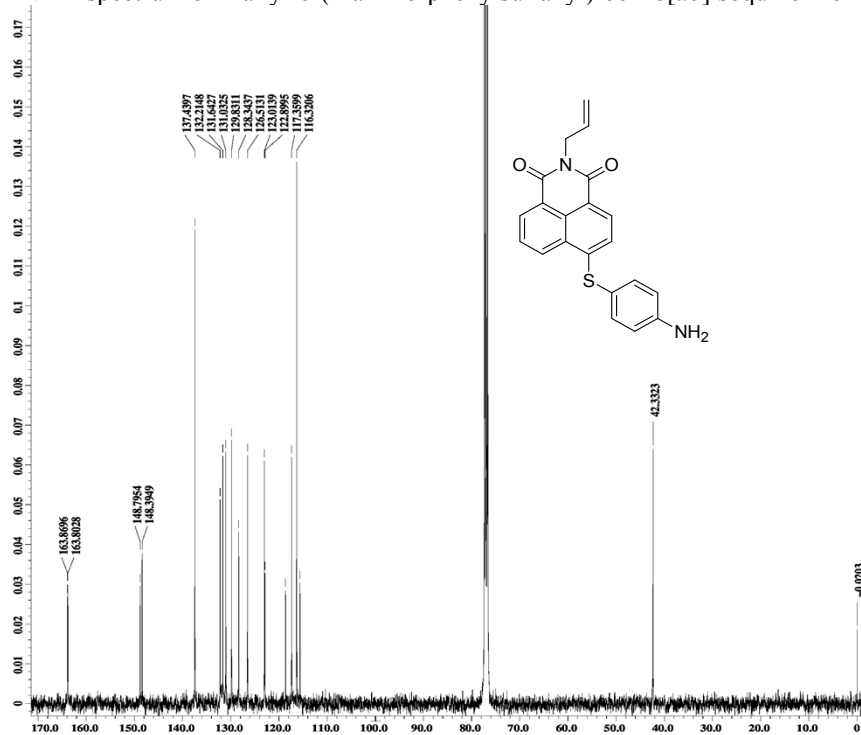

Figure S10:  $^{13}\text{C}$  NMR spectrum of 2-allyl-6-(4-amino-phenylsulfanyl)-benzo[de]isoquinoline-1,3-dione (**6d**)

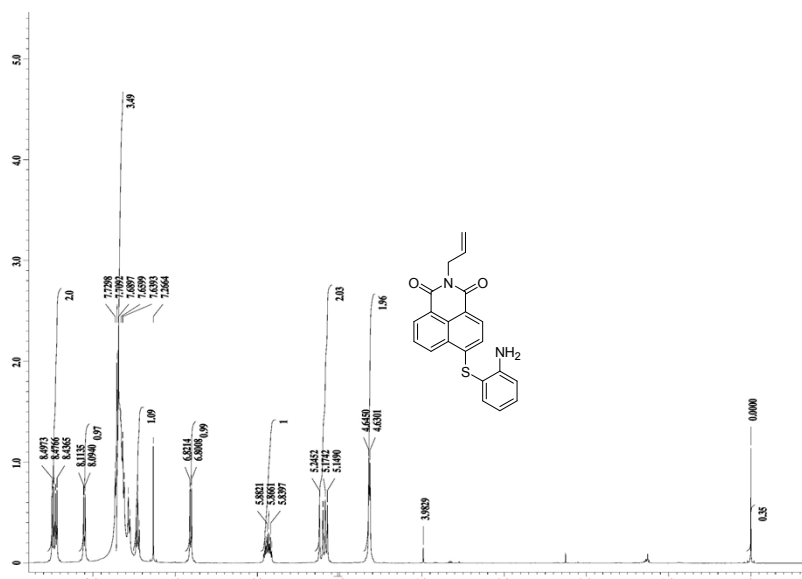

Figure S11:  $^1\text{H}$  NMR spectrum of 2-allyl-6-(2-amino-phenylsulfanyl)-benzo[de]isoquinoline-1,3-dione (6e)

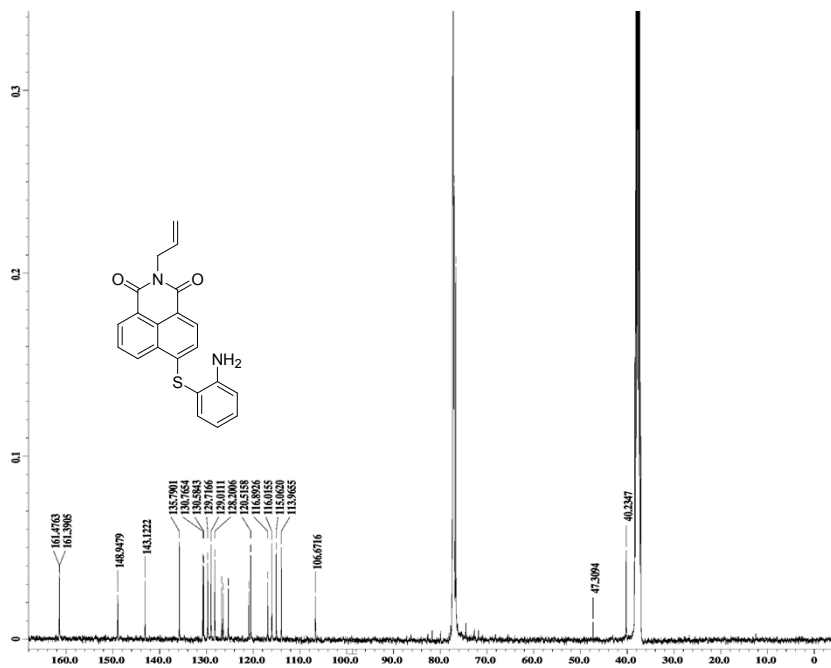

Figure S12:  $^{13}\text{C}$  NMR spectrum of 2-allyl-6-(2-amino-phenylsulfanyl)-benzo[de]isoquinoline-1,3-dione (6e)





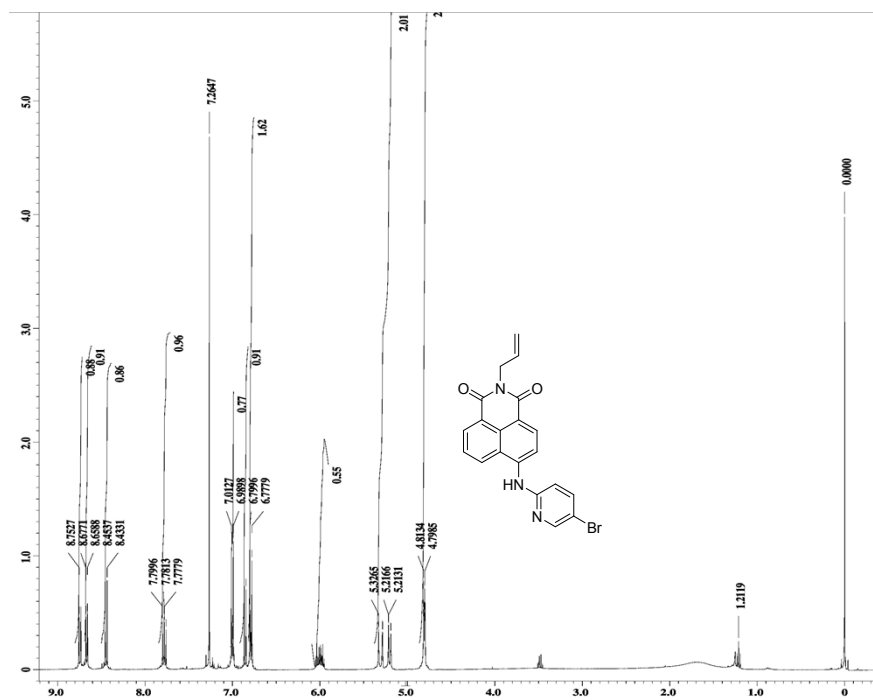

Figure S15:  $^1\text{H}$  NMR spectrum of 2-allyl-6-(5-bromo-pyridin-2-ylamino)-benzo[de]isoquinoline-1,3-dione (**6g**)

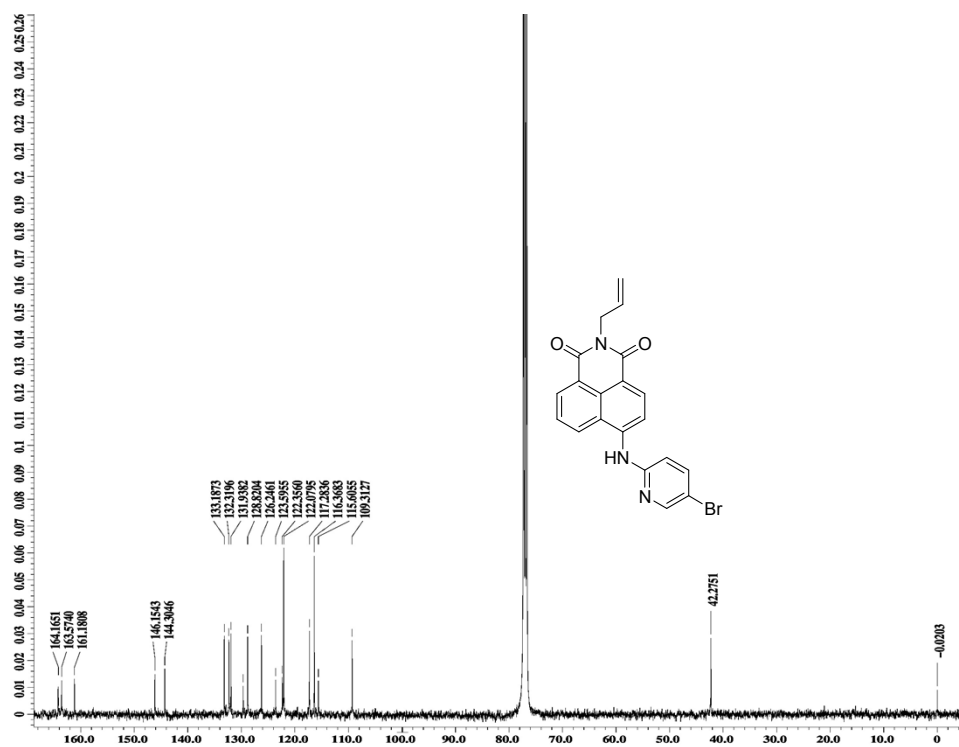

Figure S16:  $^{13}\text{C}$  NMR spectrum of 2-allyl-6-(5-bromo-pyridin-2-ylamino)-benzo[de]isoquinoline-1,3-dione (**6g**)

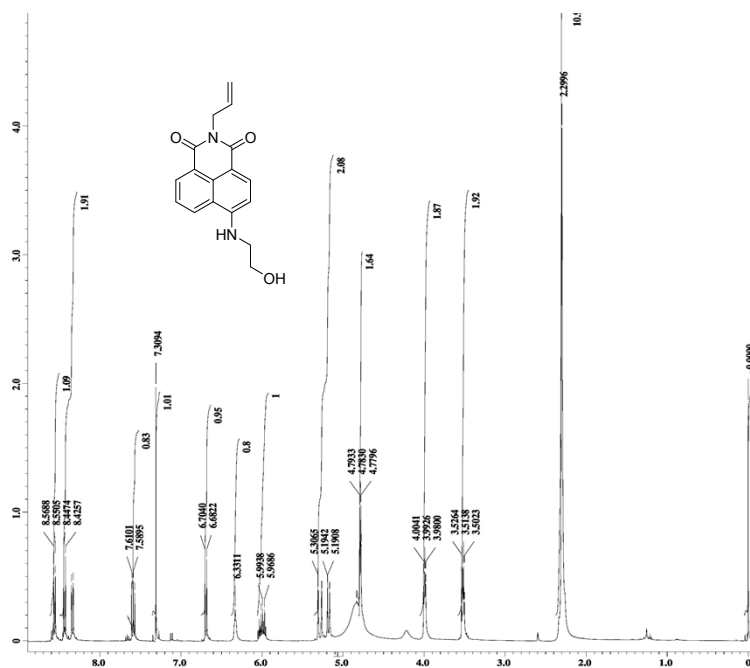

Figure S17: <sup>1</sup>H NMR spectrum of 2-allyl-6-(2-hydroxy-ethylamino)-benzo[de]isoquinoline-1,3-dione (**6h**)

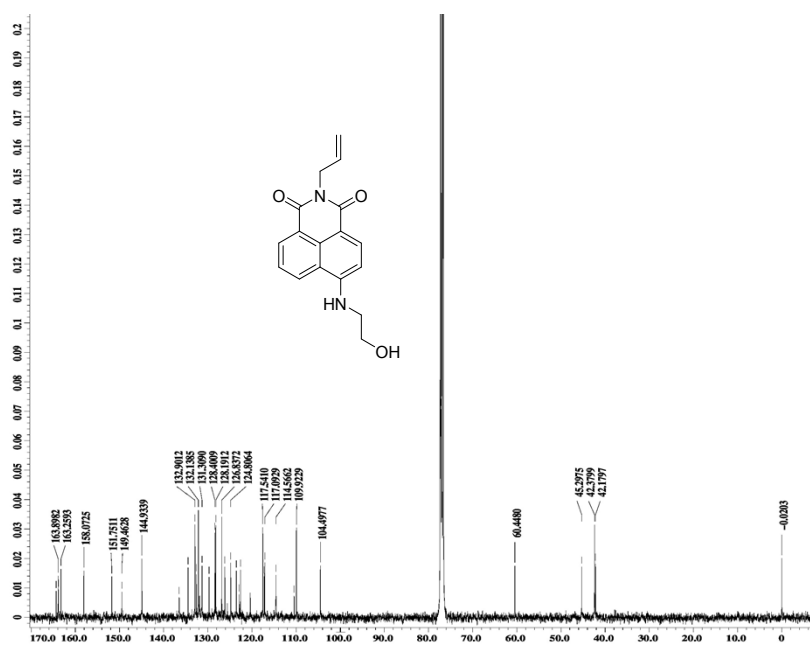

Figure S18: <sup>13</sup>C NMR spectrum of 2-allyl-6-(2-hydroxy-ethylamino)-benzo[de]isoquinoline-1,3-dione (**6h**)

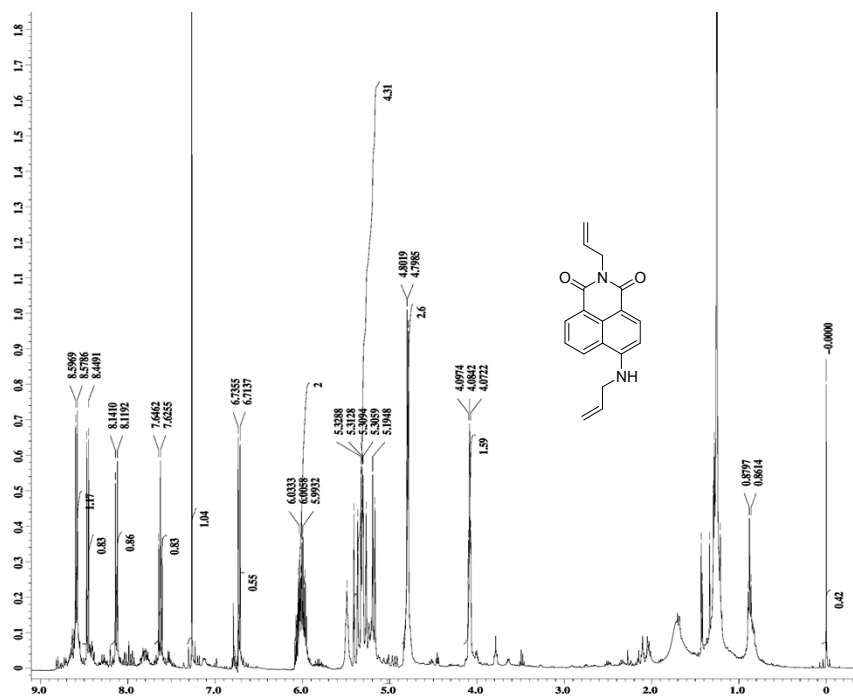

Figure S19:  $^1\text{H}$  NMR spectrum of 2-allyl-6-allylamino-benzo[de]isoquinoline-1,3-dione (**6i**)

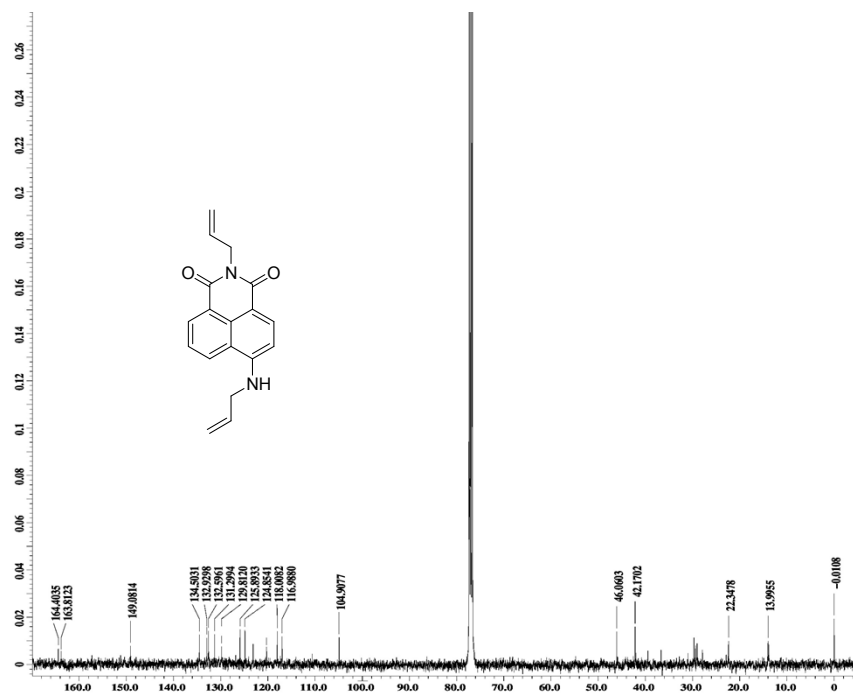

Figure S20:  $^{13}\text{C}$  NMR spectrum of 2-allyl-6-allylamino-benzo[de]isoquinoline-1,3-dione (**6i**)

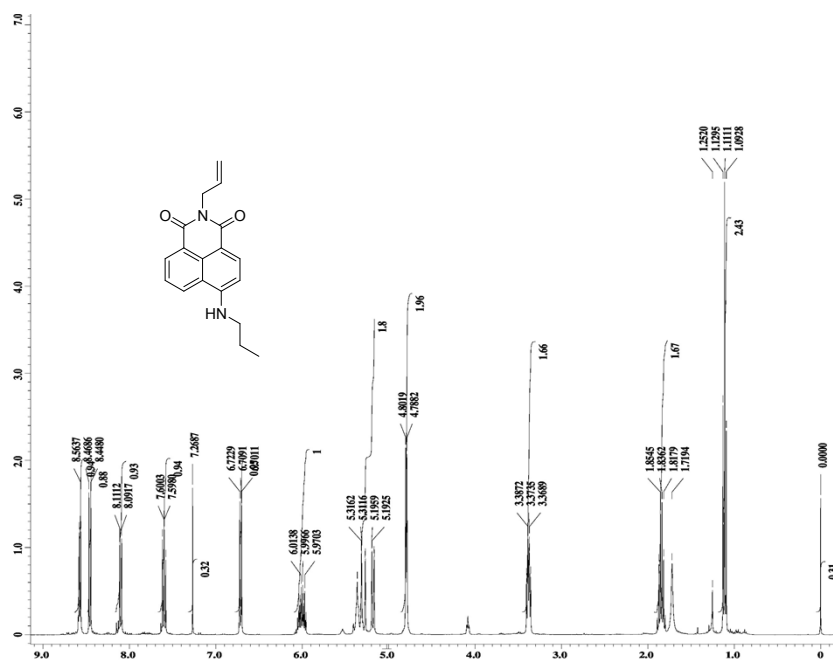

Figure S21:  $^1\text{H}$  NMR spectrum of 2-allyl-6-propylamino-benzo[de]isoquinoline-1,3-dione (6j)

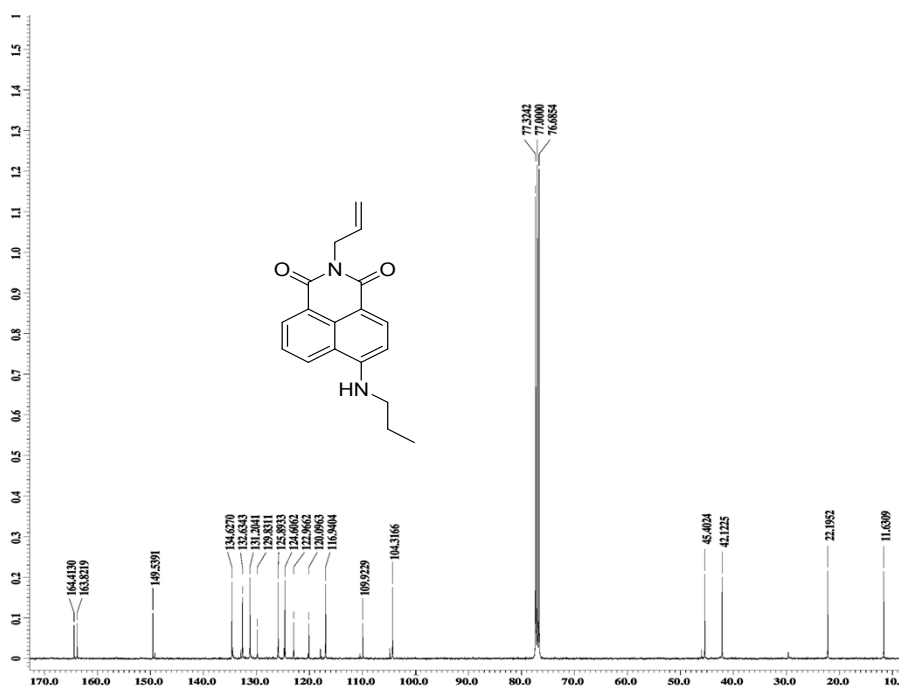

Figure S22:  $^{13}\text{C}$  NMR spectrum of 2-allyl-6-propylamino-benzo[de]isoquinoline-1,3-dione (6j)

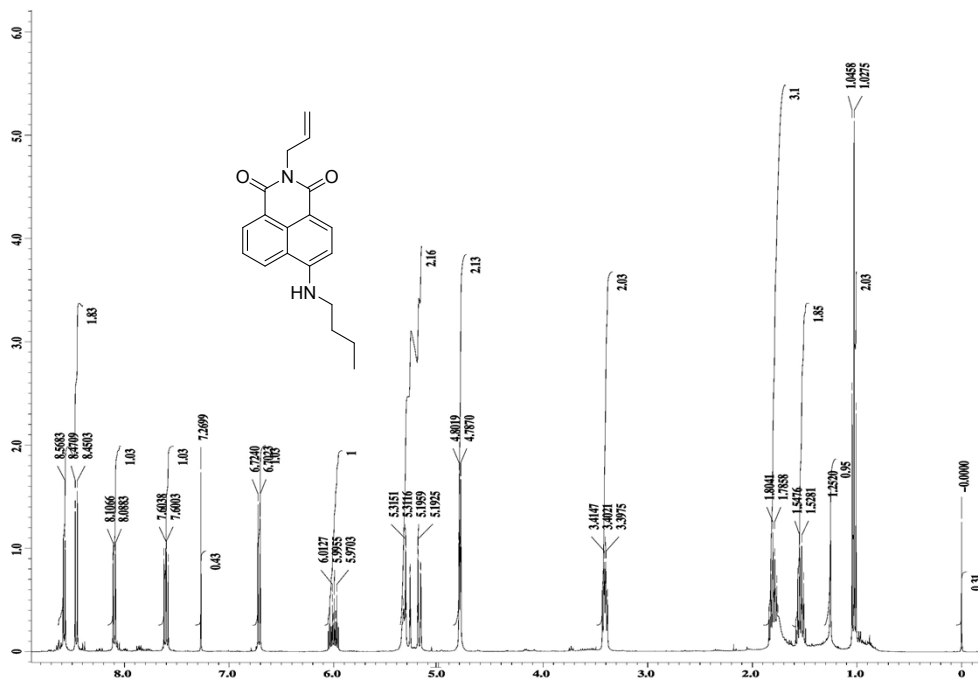

Figure S23:  $^1\text{H}$  NMR spectrum of 2-allyl-6-butylamino-benzo[de]isoquinoline-1,3-dione (6k)

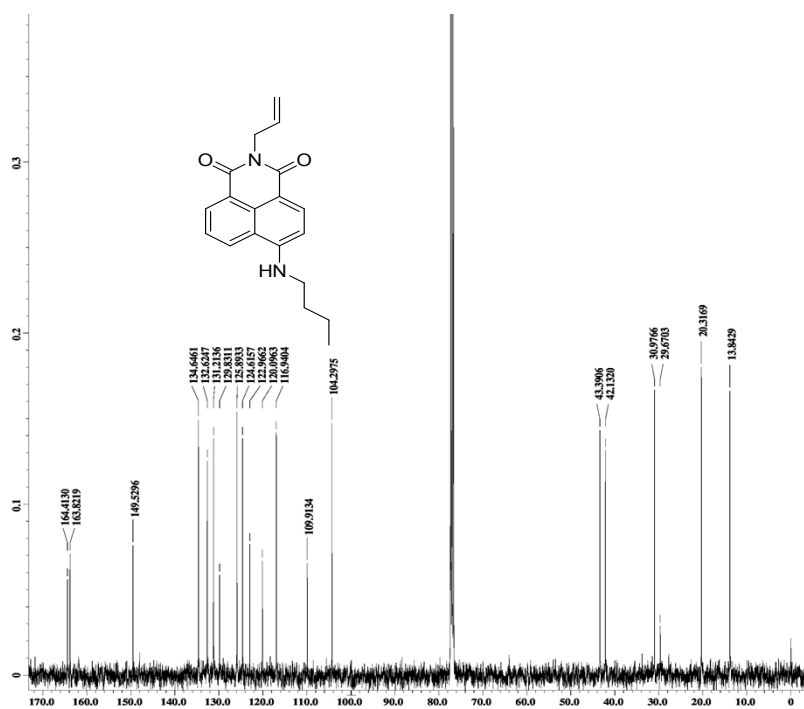

Figure S24:  $^{13}\text{C}$  NMR spectrum of 2-allyl-6-butylamino-benzo[de]isoquinoline-1,3-dione (6k)

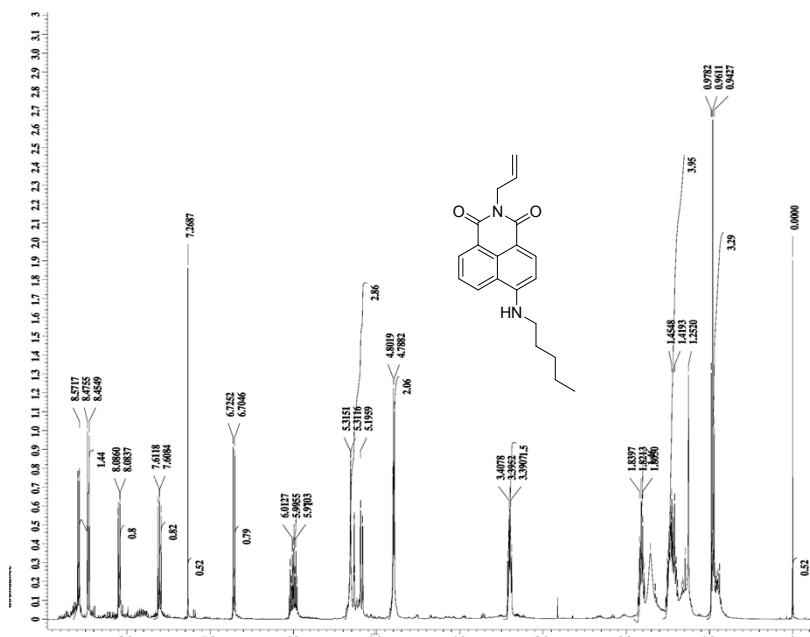

Figure S25:  $^1\text{H}$  NMR spectrum of 2-allyl-6-pentylamino-benzo[de]isoquinoline-1,3-dione (61)

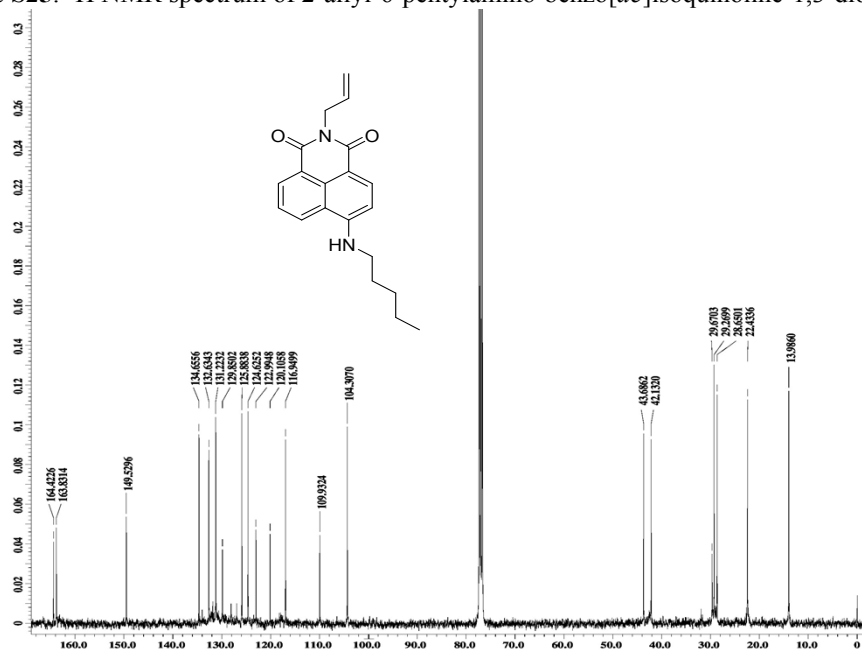

Figure S26:  $^{13}\text{C}$  NMR spectrum of 2-allyl-6-pentylamino-benzo[de]isoquinoline-1,3-dione (61)

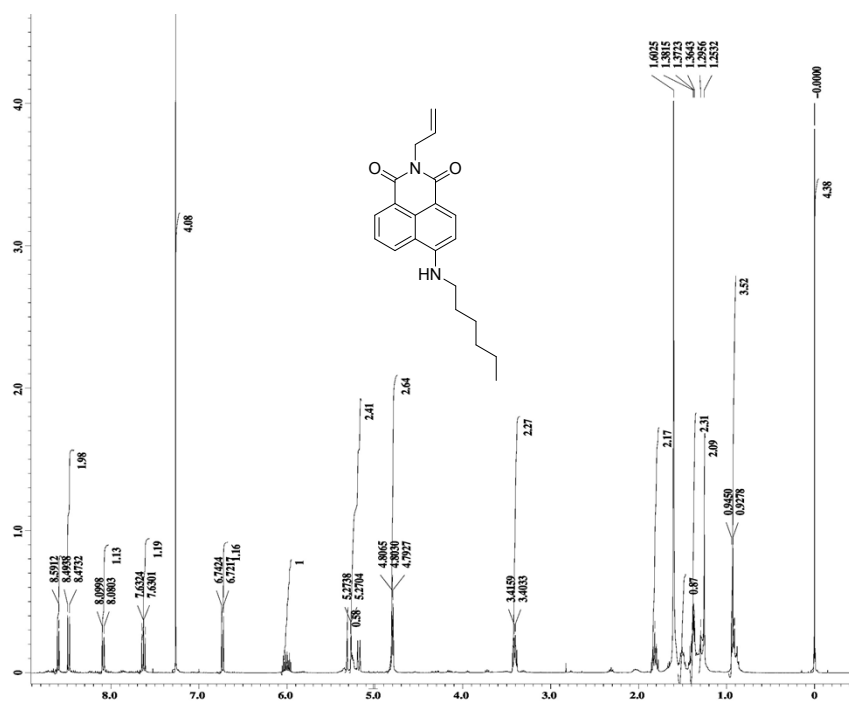

Figure S27: <sup>1</sup>H NMR spectrum of 2-allyl-6-hexylamino-benzo[de]isoquinoline-1,3-dione (**6m**)

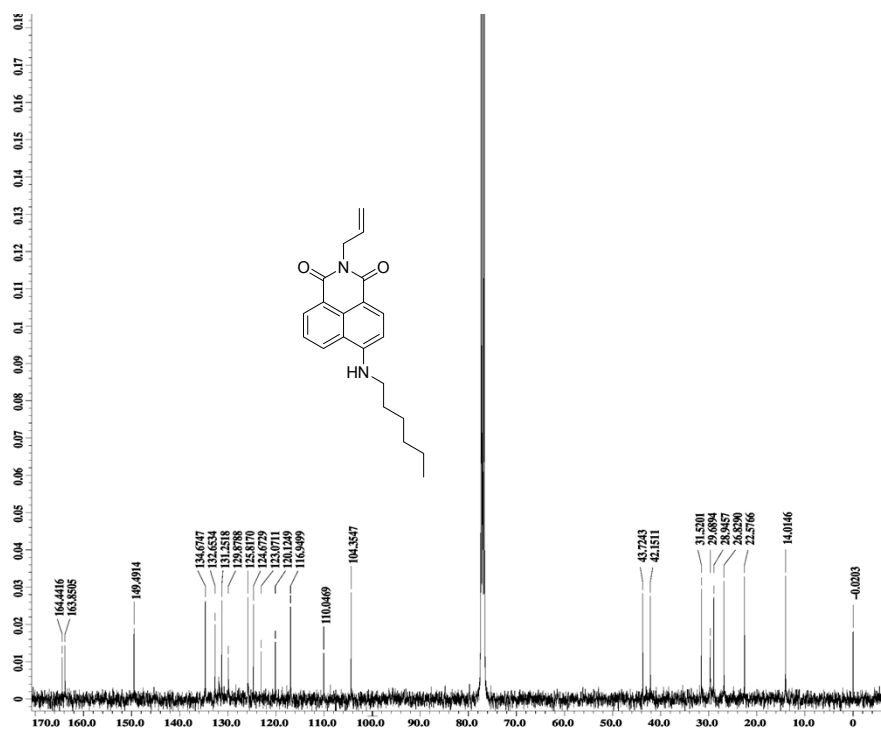

Figure S28: <sup>13</sup>C NMR spectrum of 2-allyl-6-hexylamino-benzo[de]isoquinoline-1,3-dione (**6m**)

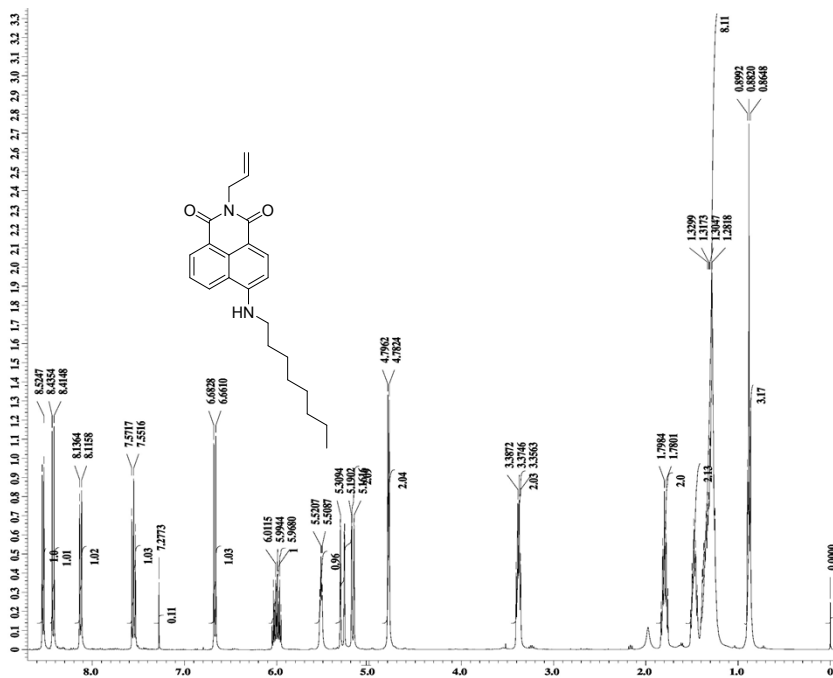

Figure S29: <sup>1</sup>H NMR spectrum of 2-allyl-6-octylamino-benzo[de]isoquinoline-1,3-dione (6n)

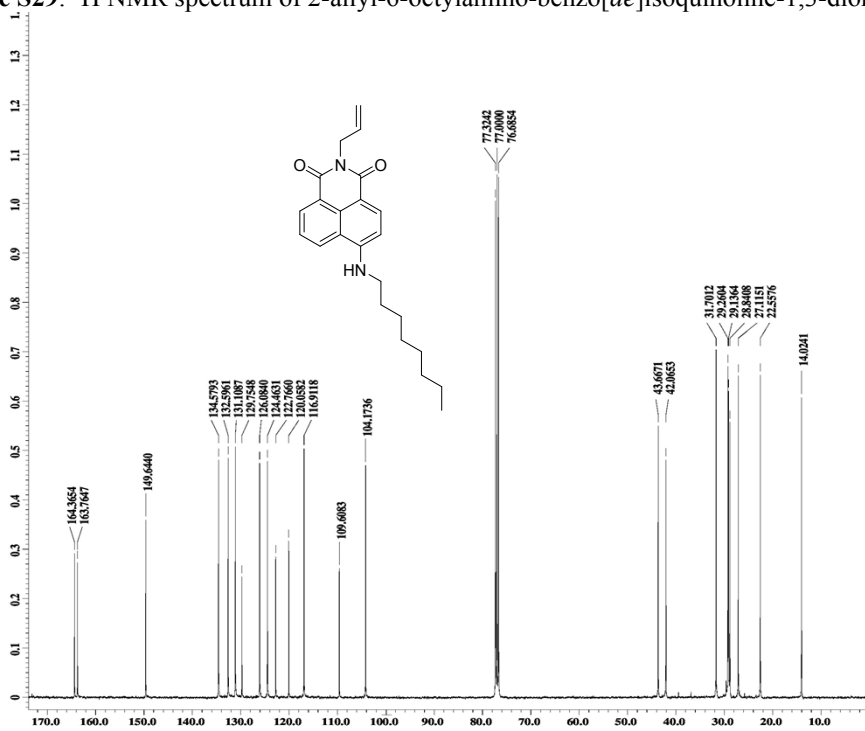

Figure S30: <sup>13</sup>C NMR spectrum of 2-allyl-6-octylamino-benzo[de]isoquinoline-1,3-dione (6n)



# 60 human cancer cell line results of compound 6b at five dose concentrations

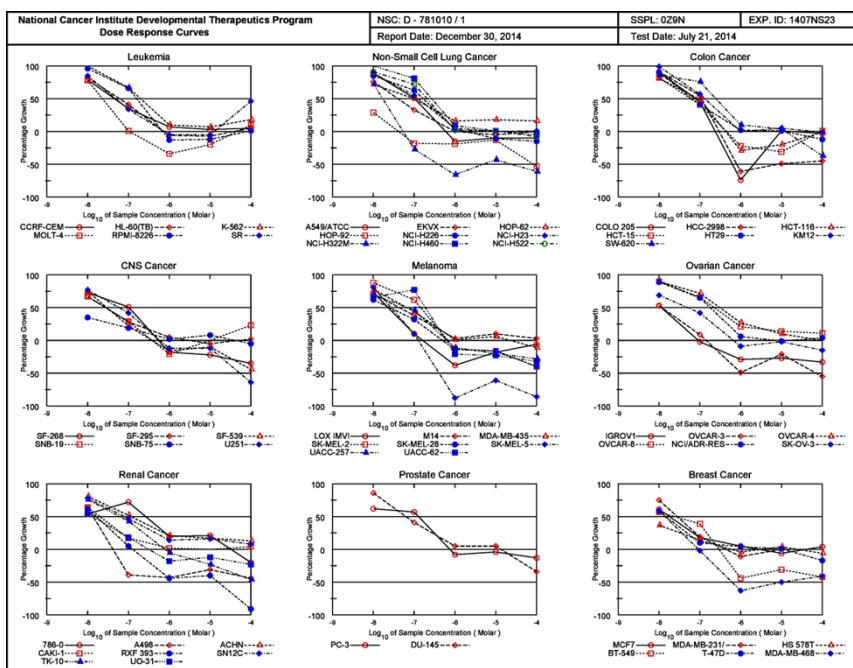

Figure S31 National Cancer Institute developmental therapeutics program *in-vitro* testing results of compound 6b at five dose level in  $\mu\text{M}$

| National Cancer Institute Developmental Therapeutics Program |       |                     |       |       |                                       |       |                          |     |                |               |      |           |           |           |           |
|--------------------------------------------------------------|-------|---------------------|-------|-------|---------------------------------------|-------|--------------------------|-----|----------------|---------------|------|-----------|-----------|-----------|-----------|
| In-Vitro Testing Results                                     |       |                     |       |       | NSC : D - 781010 / 1                  |       | Experiment ID : 1407NS23 |     | Test Type : 08 | Units : Molar |      |           |           |           |           |
| Report Date : December 30, 2014                              |       |                     |       |       | Test Date : July 21, 2014             |       |                          |     |                | QNS :         | MC : |           |           |           |           |
| COMI : Meen-376                                              |       |                     |       |       | Stain Reagent : SRB Dual-Pass Related |       |                          |     |                | SSPL : 0Z9N   |      |           |           |           |           |
| Panel/Cell Line                                              | Time  | Log10 Concentration |       |       |                                       |       | Percent Growth           | G50 | TGI            | LC50          |      |           |           |           |           |
|                                                              |       | Zero                | -8.0  | -7.0  | -6.0                                  | -5.0  |                          |     |                |               |      |           |           |           |           |
| <b>Leukemia</b>                                              |       |                     |       |       |                                       |       |                          |     |                |               |      |           |           |           |           |
| CCRF-CEM                                                     | 0.621 | 2.835               | 2.203 | 1.325 | 0.756                                 | 0.675 | 79                       | 35  | 7              | 3             | 5    | 4.52E-8   | > 1.00E-4 | > 1.00E-4 |           |
| HL-60(TB)                                                    | 1.063 | 3.285               | 2.894 | 1.981 | 1.003                                 | 0.988 | 82                       | 41  | -8             | -7            | 5    | 6.14E-8   | > 1.00E-4 | > 1.00E-4 |           |
| K-562                                                        | 0.344 | 2.397               | 2.469 | 1.729 | 0.536                                 | 0.488 | 104                      | 67  | 10             | 18            | 2    | 2.02E-7   | > 1.00E-4 | > 1.00E-4 |           |
| MOLT-4                                                       | 0.619 | 2.824               | 2.343 | 0.708 | 0.447                                 | 0.541 | 78                       | 1   | -34            | -20           | 10   | 2.30E-8   | > 1.00E-4 | > 1.00E-4 |           |
| RPMI-8226                                                    | 1.053 | 2.754               | 2.691 | 1.179 | 0.920                                 | 0.928 | 96                       | 66  | -13            | -12           | 1    | 1.61E-7   | > 1.00E-4 | > 1.00E-4 |           |
| SR                                                           | 0.229 | 0.873               | 0.778 | 0.447 | 0.219                                 | 0.217 | 85                       | 34  | -5             | -5            | 48   | 4.85E-8   | > 1.00E-4 | > 1.00E-4 |           |
| <b>Non-Small Cell Lung Cancer</b>                            |       |                     |       |       |                                       |       |                          |     |                |               |      |           |           |           |           |
| AS49ATCC                                                     | 0.335 | 2.046               | 1.886 | 1.202 | 0.286                                 | 0.301 | 89                       | 51  | -15            | -10           | -10  | 1.02E-7   | 5.95E-7   | > 1.00E-4 |           |
| EXVX                                                         | 0.661 | 1.722               | 1.484 | 1.016 | 0.659                                 | 0.627 | 76                       | 33  | -5             | -5            |      | 4.05E-8   | 9.80E-7   | > 1.00E-4 |           |
| HOP-62                                                       | 0.538 | 1.506               | 1.231 | 1.024 | 0.690                                 | 0.709 | 72                       | 50  | 16             | 18            | 18   | 1.01E-7   | > 1.00E-4 | > 1.00E-4 |           |
| NCI-H226                                                     | 1.253 | 1.376               | 1.341 | 1.032 | 0.110                                 | 0.096 | 29                       | -16 | -19            | -13           | -53  | < 1.00E-8 | 4.10E-8   | 6.41E-5   |           |
| NCI-H23                                                      | 0.671 | 1.842               | 1.499 | 1.286 | 0.705                                 | 0.598 | 85                       | 63  | 4              | -11           | -15  | 1.67E-7   | 1.75E-6   | > 1.00E-4 |           |
| NCI-H322M                                                    | 0.657 | 2.269               | 2.113 | 1.554 | 0.734                                 | 0.659 | 89                       | 55  | 5              | 1             | 1    | 1.26E-7   | > 1.00E-4 | > 1.00E-4 |           |
| NCI-H460                                                     | 0.772 | 1.909               | 1.605 | 0.564 | 0.263                                 | 0.442 | 73                       | -27 | -66            | -43           | -61  | 1.71E-8   | 5.36E-8   | > 1.00E-4 |           |
| NCI-H522                                                     | 0.287 | 2.054               | 2.112 | 1.722 | 0.453                                 | 0.298 | 103                      | 81  | 9              | 1             | -5   | 2.72E-7   | 1.27E-5   | > 1.00E-4 |           |
|                                                              | 0.671 | 2.179               | 2.041 | 1.758 | 0.697                                 | 0.682 | 91                       | 72  | 2              | 1             | -8   | 2.06E-7   | 1.23E-5   | > 1.00E-4 |           |
| <b>Colon Cancer</b>                                          |       |                     |       |       |                                       |       |                          |     |                |               |      |           |           |           |           |
| CCLO 205                                                     | 0.483 | 1.550               | 1.446 | 0.957 | 0.119                                 | 0.469 | 91                       | 45  | -74            | 1             | -3   | 7.93E-8   |           |           |           |
| HCC-2998                                                     | 1.104 | 3.223               | 3.042 | 2.288 | 0.435                                 | 0.567 | 80                       | 55  | -61            | -49           | -45  | 1.10E-7   | 2.99E-7   |           |           |
| HCT-116                                                      | 0.210 | 1.753               | 1.483 | 0.973 | 0.150                                 | 0.167 | 208                      | 81  | -29            | -20           | -1   | 9.61E-8   | 4.28E-7   | > 1.00E-4 |           |
| HCT-15                                                       | 0.231 | 1.696               | 1.409 | 0.820 | 0.180                                 | 0.160 | 239                      | 82  | 41             | -22           | -31  | 1         | 6.05E-8   | > 1.00E-4 | > 1.00E-4 |
| HT29                                                         | 0.170 | 1.198               | 1.014 | 0.553 | 0.187                                 | 0.178 | 176                      | 90  | 2              | 1             | -12  | 5.50E-8   | 1.11E-5   | > 1.00E-4 |           |
| KM12                                                         | 0.370 | 1.975               | 1.965 | 1.277 | 0.375                                 | 0.457 | 365                      | 99  | 57             | 5             | -1   | 1.31E-7   | 6.09E-5   | > 1.00E-4 |           |
| SW-620                                                       | 0.325 | 1.368               | 1.237 | 1.137 | 0.428                                 | 0.368 | 204                      | 86  | 76             | 10            | -37  | 2.49E-7   | 1.25E-5   | > 1.00E-4 |           |
| <b>CNS Cancer</b>                                            |       |                     |       |       |                                       |       |                          |     |                |               |      |           |           |           |           |
| SF-298                                                       | 0.423 | 1.384               | 1.129 | 0.914 | 0.347                                 | 0.329 | 274                      | 73  | 51             | -18           | -22  | -35       | 1.04E-7   | 5.48E-7   | > 1.00E-4 |
| SF-295                                                       | 0.629 | 2.269               | 1.746 | 1.100 | 0.708                                 | 0.601 | 663                      | 67  | 28             | 5             | -5   | 2.78E-8   |           | > 1.00E-4 |           |
| SF-539                                                       | 0.787 | 2.512               | 2.079 | 1.160 | 0.662                                 | 0.711 | 444                      | 75  | 22             | -16           | -10  | 44        | 2.93E-8   | 3.76E-7   | > 1.00E-4 |
| SNB-19                                                       | 0.523 | 1.251               | 1.012 | 0.736 | 0.416                                 | 0.527 | 692                      | 67  | 29             | -21           | 23   | 2.84E-8   |           | > 1.00E-4 |           |
| SNB-75                                                       | 0.831 | 1.524               | 1.076 | 0.963 | 0.845                                 | 0.866 | 789                      | 35  | 19             | 2             | 8    | < 1.00E-8 | 4.06E-5   | > 1.00E-4 |           |
| U251                                                         | 0.376 | 1.940               | 1.576 | 1.035 | 0.332                                 | 0.331 | 137                      | 77  | 42             | -12           | -12  | 64        | 5.92E-8   | 6.06E-7   | 5.45E-5   |
| <b>Melanoma</b>                                              |       |                     |       |       |                                       |       |                          |     |                |               |      |           |           |           |           |
| LOX IMVI                                                     | 0.449 | 2.717               | 2.103 | 0.668 | 0.279                                 | 0.370 | 423                      | 73  | 10             | -38           | -18  | -8        | 2.30E-8   | 1.59E-7   | > 1.00E-4 |
| M14                                                          | 0.552 | 2.023               | 1.598 | 1.108 | 0.596                                 | 0.704 | 594                      | 71  | 38             | 3             | 10   | 3         | 4.29E-8   | > 1.00E-4 | > 1.00E-4 |
| MDA-MB-435                                                   | 0.446 | 1.813               | 1.514 | 1.045 | 0.465                                 | 0.523 | 399                      | 78  | 44             | 1             | 6    | -11       | 6.59E-8   | 2.22E-5   | > 1.00E-4 |
| SK-MEL-2                                                     | 0.832 | 2.306               | 2.137 | 1.750 | 0.726                                 | 0.697 | 502                      | 88  | 62             | -13           | -16  | -40       | 1.46E-7   | 6.75E-7   | > 1.00E-4 |
| SK-MEL-28                                                    | 0.830 | 2.185               | 1.672 | 1.267 | 0.711                                 | 0.695 | 502                      | 62  | 32             | -14           | -16  | -40       | 2.54E-8   | 4.62E-7   | > 1.00E-4 |
| SK-MEL-5                                                     | 0.664 | 2.733               | 2.341 | 0.876 | 0.082                                 | 0.280 | 0.994                    | 81  | 10             | -88           | -61  | -86       | 2.74E-8   | 1.27E-7   | 4.12E-7   |
| UACC-257                                                     | 1.031 | 2.442               | 2.014 | 1.662 | 0.918                                 | 0.822 | 747                      | 70  | 46             | -11           | -20  | -28       | 6.85E-8   | 6.42E-7   | > 1.00E-4 |
| UACC-62                                                      | 0.885 | 2.648               | 2.053 | 2.238 | 0.702                                 | 0.679 | 600                      | 66  | 77             | -21           | -23  | -32       | 1.88E-7   | 6.13E-7   | > 1.00E-4 |
| <b>Ovarian Cancer</b>                                        |       |                     |       |       |                                       |       |                          |     |                |               |      |           |           |           |           |
| IGROV1                                                       | 0.586 | 1.867               | 1.267 | 0.574 | 0.416                                 | 0.428 | 0.390                    | 53  | -2             | -29           | -27  | -33       | 1.14E-8   | 9.15E-8   | > 1.00E-4 |
| OVCAR-3                                                      | 0.650 | 1.898               | 1.314 | 0.762 | 0.329                                 | 0.511 | 0.293                    | 53  | 9              | -49           | -21  | -55       | 1.18E-8   | 1.42E-7   | 7.10E-5   |
| OVCAR-4                                                      | 0.702 | 1.397               | 1.327 | 1.201 | 0.993                                 | 0.771 | 705                      | 90  | 72             | 27            | 10   | 13        | 1.13E-7   | > 1.00E-4 | > 1.00E-4 |
| OVCAR-8                                                      | 0.422 | 1.979               | 1.824 | 1.453 | 0.753                                 | 0.640 | 0.598                    | 90  | 66             | 21            | 14   | 11        | 2.29E-7   | > 1.00E-4 | > 1.00E-4 |
| NCI/ADR-RES                                                  | 0.567 | 1.871               | 1.731 | 1.416 | 0.645                                 | 0.564 | 0.619                    | 89  | 65             | 6             | -1   | 4         | 1.80E-7   | > 1.00E-4 | > 1.00E-4 |
| SK-OV-3                                                      | 0.766 | 1.554               | 1.334 | 1.106 | 0.698                                 | 0.749 | 0.650                    | 69  | 42             | -9            | -2   | -15       | 4.98E-8   | 6.67E-7   | > 1.00E-4 |
| <b>Renal Cancer</b>                                          |       |                     |       |       |                                       |       |                          |     |                |               |      |           |           |           |           |
| 786-O                                                        | 0.964 | 2.820               | 1.970 | 2.294 | 1.336                                 | 1.351 | 0.774                    | 54  | 72             | 20            | 21   | -20       | 2.63E-7   | 3.27E-5   | > 1.00E-4 |
| A498                                                         | 1.357 | 1.742               | 1.605 | 0.831 | 0.774                                 | 0.632 | 0.758                    | 64  | -39            | -43           | -31  | -44       | 1.38E-8   | 4.21E-8   | > 1.00E-4 |
| ACHN                                                         | 0.528 | 2.155               | 1.840 | 1.367 | 0.875                                 | 0.798 | 0.740                    | 81  | 52             | 21            | 17   | 13        | 1.13E-7   | > 1.00E-4 | > 1.00E-4 |
| CAKI-1                                                       | 0.473 | 2.045               | 1.474 | 0.735 | 0.503                                 | 0.471 | 0.534                    | 64  | 17             | 2             | 4    | 4         | 1.95E-8   | > 1.00E-4 | > 1.00E-4 |
| RFX 393                                                      | 0.594 | 1.182               | 0.958 | 0.626 | 0.333                                 | 0.359 | 0.054                    | 62  | 5              | -44           | -40  | -91       | 1.62E-8   | 1.28E-7   | 1.59E-5   |
| SKNSC                                                        | 0.702 | 2.406               | 2.051 | 1.502 | 0.937                                 | 0.976 | 0.636                    | 78  | 29             | 14            | 16   | 8         | 7.96E-8   | > 1.00E-4 | > 1.00E-4 |
| TK-10                                                        | 0.922 | 2.195               | 1.896 | 1.472 | 0.877                                 | 0.710 | 0.501                    | 76  | 43             | -5            | -23  | -46       | 6.23E-8   | 7.91E-7   | > 1.00E-4 |
| UC-31                                                        | 0.641 | 1.896               | 1.326 | 0.873 | 0.527                                 | 0.562 | 0.494                    | 55  | 18             | -18           | -12  | -23       | 1.34E-8   | 3.22E-7   | > 1.00E-4 |
| <b>Prostate Cancer</b>                                       |       |                     |       |       |                                       |       |                          |     |                |               |      |           |           |           |           |
| PC-3                                                         | 0.718 | 1.967               | 1.494 | 1.431 | 0.659                                 | 0.690 | 0.623                    | 62  | 57             | -8            | -4   | -13       | 1.28E-7   | 7.48E-7   | > 1.00E-4 |
| DU-145                                                       | 0.444 | 1.501               | 1.354 | 0.880 | 0.502                                 | 0.499 | 0.293                    | 86  | 41             | 5             | 5    | -34       | 6.38E-8   | 1.36E-5   | > 1.00E-4 |
| <b>Breast Cancer</b>                                         |       |                     |       |       |                                       |       |                          |     |                |               |      |           |           |           |           |
| MCF7                                                         | 0.310 | 1.731               | 1.177 | 0.565 | 0.374                                 | 0.292 | 0.363                    | 91  | 18             | 5             | -6   | 4         | 1.80E-8   |           | > 1.00E-4 |
| MDA-MB-231/ATCC                                              | 0.653 | 1.437               | 1.241 | 0.603 | 0.383                                 | 0.655 | 0.657                    | 75  | 19             | -11           | -1   | -1        | 2.80E-8   | > 1.00E-4 | > 1.00E-4 |
| HS 578T                                                      | 1.127 | 1.924               | 1.419 | 1.238 | 0.688                                 | 1.157 | 1.062                    | 37  | 14             | -4            | 4    | -6        | < 1.00E-8 | > 1.00E-4 | > 1.00E-4 |
| BT-549                                                       | 0.977 | 2.183               | 1.859 | 1.445 | 0.548                                 | 0.671 | 0.570                    | 57  | 39             | -44           | -31  | -42       | 2.34E-8   | 2.94E-7   | > 1.00E-4 |
| T-47D                                                        | 0.533 | 1.021               | 0.817 | 0.564 | 0.552                                 | 0.539 | 0.441                    | 58  | 10             | 4             | 1    | -17       | 1.46E-8   | 1.15E-5   | > 1.00E-4 |
| MDA-MB-468                                                   | 0.768 | 1.665               | 1.294 | 0.751 | 0.281                                 | 0.387 | 0.455                    | 59  | -2             | -63           | -50  | -41       | 1.39E-8   | 9.20E-8   | > 1.00E-4 |

Figure S32 National Cancer Institute developmental therapeutics program *in-vitro* testing results of compound 6b at five dose level in  $\mu\text{M}$ .

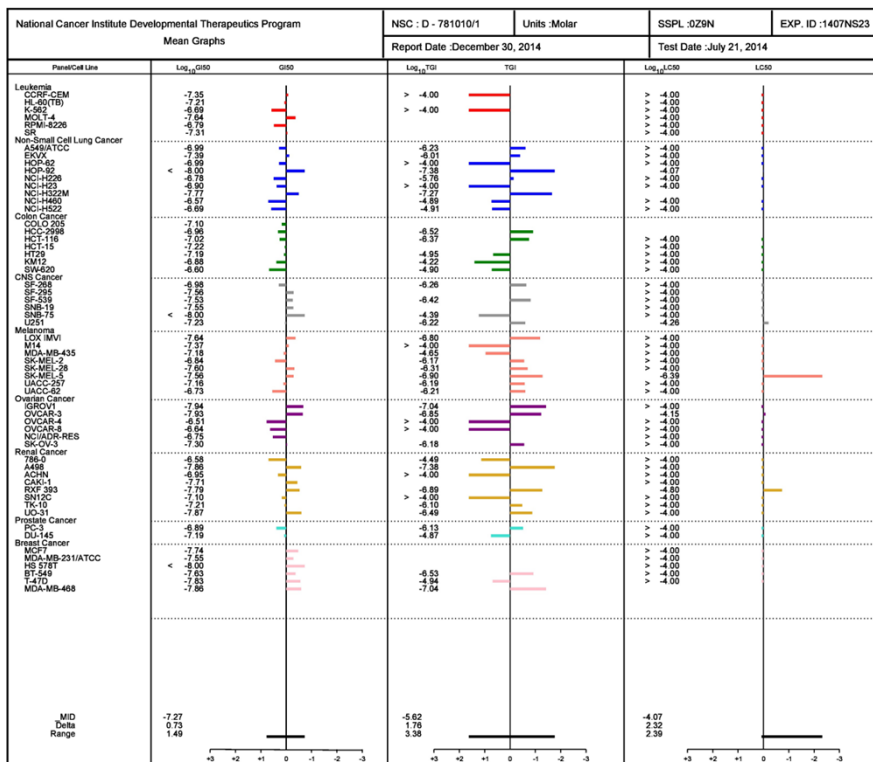

Figure S33 National Cancer Institute developmental therapeutics program *in-vitro* testing results of compound **6b** at five dose level in  $\mu\text{M}$ .

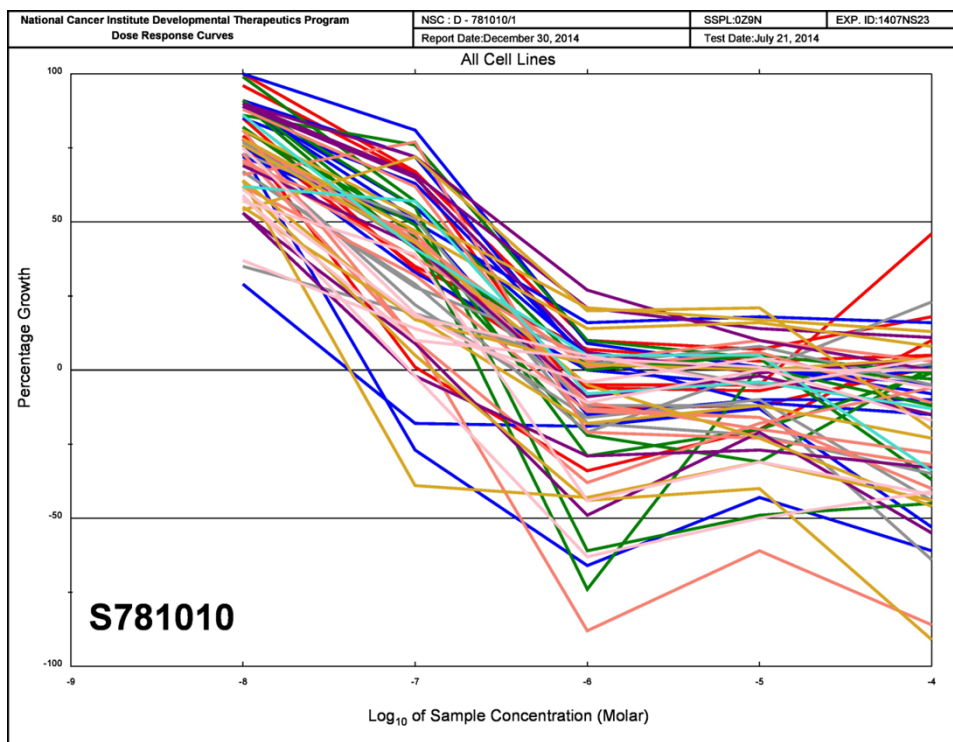

Figure S34 Five dose assay graph of compound **6b** against nine panel cancer cell line at NCI

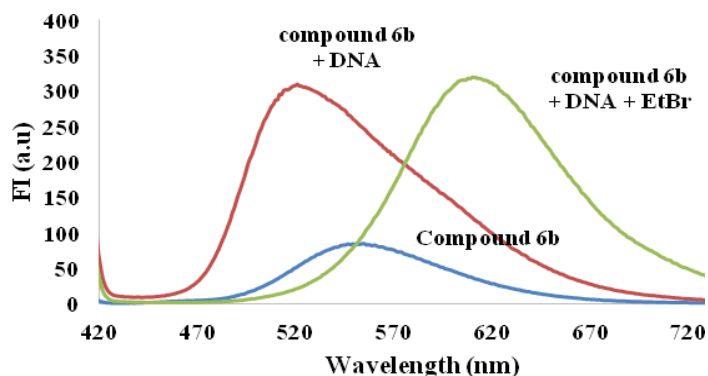

**Figure S35** EtBr indicator displacement assay to show reversibility of compound **6b**:DNA binding

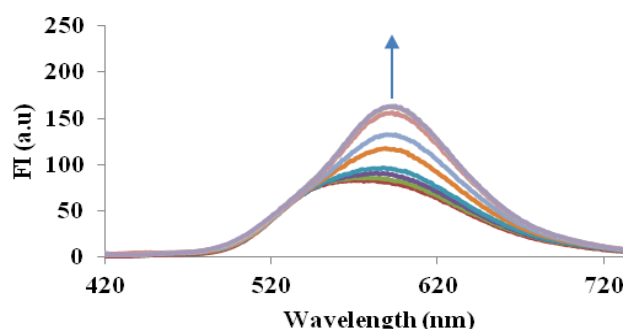

**Figure S36** Effect of incremental addition of compound **6b** on EtBr:DNA complex

**Molecular Modelling (Docking):** Coordinates from the X-ray crystal structure of DNA (pdb ID 1BNA) were taken from the RCSB Protein Data Bank. Compounds were constructed with the builder toolkit of the software package ArgusLab 4.0.1 ([www.arguslab.com](http://www.arguslab.com)) and energy minimized using the semiempirical quantum mechanical method PM3. The DNA structure was chosen, and the active site was defined around the ligand. The molecule to be docked in the DNA was inserted into the work space carrying the structure of the enzyme. The docking program implements an efficient grid-based docking algorithm, which approximates an exhaustive search within the free volume of the binding site cavity. The conformational space was surveyed by the geometry optimization of the flexible ligand (rings are treated as rigid) in combination with the incremental construction of the ligand torsions. Thus, docking occurred between the flexible ligand parts of the compound and DNA. The ligand orientation was determined by a shape scoring function based on Ascore and the final positions were ranked by lowest interaction energy values. Van der Waal's and hydrophobic interactions between the compound and DNA were explored.
